# Supplementary material for: Phase IIa clinical trial of complement C3 inhibitor AMY-101 in adults with periodontal inflammation
Source: JCI journal article supplement (doi:10.1172/jci152973), 2021-10-07
Supplement: sd1 [file 1]

1 **Supplementary Material**

2 **The Forsyth Institute Center for Clinical and Translational Research staff consortium**  
3 **members**

4 Elida Salazar, RDH; The Forsyth Institute Center for Clinical and Translational Research, Cambridge, MA,  
5 USA

6 Melissa Martins, RDH; The Forsyth Institute Center for Clinical and Translational Research, Cambridge,  
7 MA, USA

8 Gay Torresyap, RDH; The Forsyth Institute Center for Clinical and Translational Research, Cambridge,  
9 MA, USA

10 Constantinos Floros, RDA; The Forsyth Institute Center for Clinical and Translational Research,  
11 Cambridge, MA, USA

12

13 **Materials and Methods**

14 **Overall Study Design and Plan**

15 This Phase 2a, single-center, 3-month randomized, double-blind, placebo-controlled, split-mouth  
16 design study was conducted in adults with existing chronic gingival inflammation (presented as  
17 gingivitis or periodontitis), as determined by mean full mouth MGI of  $\geq 2.0$  and percent BOP of  
18  $\geq 40\%$  at screening/baseline. The study was conducted to determine whether the local  
19 complement inhibition resulted in reversal of clinical signs of gingival inflammation.

20 The total study duration was 16 months including 4 months of subject participation from the  
21 screening visit (within 30 days of baseline). There was a 2-month pause to the study enrollment  
22 due to State restrictions for coronavirus 2019 (COVID-19) pandemic.

23 ***Dose-Escalation Phase***

24 The study design included a dose escalating phase to choose the safe and effective dose for the  
25 main study. Escalating doses of AMY-101 and placebo were injected into interproximal gingival  
26 tissues at buccal and lingual aspects in different halves of the mouth (split-mouth design) once a  
27 week on Days 0, 7, and 14. Initially 4 subjects received 0.025 mg dose/interdental papilla of AMY-  
28 101 and evaluated for safety and injection-site reactions (ISRs). With no significant events  
29 observed up to Day 28, another 4 subjects received 0.05 mg/interdental papilla of AMY-101 who  
30 were observed up to Day 28. With no serious TEAEs or significant ISRs reported, another 4  
31 subjects received 0.10 mg dose/interdental papilla who were observed up to Day 28. For interim

32 analysis, the 3 cohorts (0.025 mg/interdental papilla, 0.05 mg/interdental papilla and  
33 0.10 mg/interdental papilla) were assessed for safety and efficacy parameters, and based on this  
34 assessment, the PI and DSMB decided to treat the additional 28 subjects with 0.10 mg  
35 dose/interdental papilla.

36 **Supplementary Table 1. Dose Escalation and Stopping Rules**

|                                |                                                                            |
|--------------------------------|----------------------------------------------------------------------------|
| If 0/4 subjects had DLT        | Escalated to the next higher dose level                                    |
| If 1/4 subjects had DLT        | Repeated the current dose level or escalated to the next higher dose level |
| If $\geq 2/4$ subjects had DLT | Lowered the dose or stopped further dosing                                 |
| DLT = dose limiting toxicity   |                                                                            |

37 **Main Study Phase**

38 The study consisted of a Screening, a Baseline Visit (Study Visit 1), and Study Visits 2 to 8.

39 **Screening Visit**

40 Subjects underwent evaluation of eligibility criteria, collection of medical, dental and medication  
41 history, urine pregnancy test (in women with childbearing potential), and complete oral  
42 examination, and periodontal clinical measurements after providing an informed consent to  
43 participate in the study.

44 **Study Visits**

45 Baseline Visit (Day 0, Study Visit 1)

46 Within 30 days after Screening, subjects returned for the Baseline Visit. At this visit, subjects  
47 underwent a medical and dental history review; complete oral examination; urine pregnancy test  
48 (in women with childbearing potential); measurements of height and weight; assessment of  
49 concomitant medications; evaluation for unanticipated problems (UPs); collection of baseline  
50 biological samples; collection of samples for anti-drug antibody assessment; assessment of vital  
51 signs; and baseline periodontal measurements. Baseline periodontal assessments were  
52 performed on 6 sites per tooth for all teeth (excluding third molars) and included the following:  
53 modified gingival index (MGI), probing depth (PD), bleeding on probing (BOP), measurement of  
54 distance from the cemento-enamel junction (CEJ) to the free gingival margin (GM), and plaque  
55 index (PI). Clinical attachment level (CAL) was calculated by subtracting the distance between  
56 CEJ and GM from the PD.

57 The GCF samples were collected from two sites with highest gingival index in each quadrant at  
58 Baseline to detect the levels of matrix metalloproteinases in the GCF.

59 Safety and efficacy parameters were assessed before treatment at Baseline. Once biological  
60 samples were collected and clinical examination completed, randomly assigned halves of the  
61 mouth (split-mouth design) received injections of either AMY-101 (0.025 mg, 0.05 mg or 0.1 mg  
62 in 25 µl or 50 µl) or Placebo (25 µl or 50 µl) in every interproximal papilla at both buccal and  
63 palatal/lingual aspects with Gingival Index score of  $\geq 1$ . The injections were administered once a  
64 week on Day 0 (Baseline), Day 7, and Day 14.

65

#### 66 Study Visits 2 through 8 (Day 3 - Day 90)

- 67 • Subjects returned to clinic on Days 3, 7, 14, 21, 28, 60, and 90 after initial application of  
68 AMY-101 and placebo for safety evaluations, periodontal assessments, and biological  
69 sampling
- 70 • At each visit, the subject underwent a medical and dental history review, complete oral  
71 examination, assessment of concomitant medications, assessment of vital signs, and  
72 evaluation for AEs and UPs
- 73 • Safety parameters were assessed on Days 3, 7, 14, 21, 28, 60, and 90 after initial  
74 treatment
- 75 • Efficacy parameters were assessed on Days 21, 28, 60, and 90 after initial treatment
- 76 • After the 90 days follow-up visit, subjects received a complete oral debridement  
77 consisting of supra and sub gingival prophylaxis, and referred to further periodontal  
78 treatment, if needed.

79 The clinician who performed periodontal and oral examination assessments in each subject was  
80 different from the clinician who injected AMY-101 and placebo. A participant was considered to  
81 have completed the study if he or she had completed all phases of the study including the last  
82 visit or the last scheduled procedure.

83

#### 84 **Study Design Rationale**

85 The split-mouth design was chosen to minimize subject level variability between groups, optimize  
86 recruitment efforts and allow for the use of more powerful paired statistical tests. Given that local

87 application of AMY-101 at the doses proposed had demonstrated no significant systemic effects  
88 on complement inhibition in a pre-clinical model of non-human primates, a split-mouth design  
89 helped to examine the local effects of direct application of the drug into gingival tissues by  
90 comparing results to the placebo-injected side of the mouth. In this split-mouth design, the  
91 interdental papilla between teeth 8 and 9 as well as 25 and 24, were not treated, to specifically  
92 apply the split mouth and separate two halves. Sites with gingival index of  $\geq 1$  were treated, to  
93 ensure well balanced groups regarding inflammation parameters at the site level. Subjects with  
94 generalized gingivitis (MGI  $\geq 2.0$  and 40% BOP) were included in the study, but more specifically,  
95 to address the severity between mouth halves, a randomized designation of treatments for each  
96 subject was applied.

## 97 **Selection of Study Population**

### 98 **Inclusion Criteria**

99 Each subject had to meet all of the following criteria to be eligible for the study:

- 100 1. Provide a signed and dated informed consent
- 101 2. State his/her willingness to comply with all study procedures and availability for the  
102 duration of the study
- 103 3. Was 18 to 65 years of age
- 104 4. Had  $\geq 20$  natural teeth (excluding third molars)
- 105 5. Had generalized plaque-induced gingival inflammation determined by MGI and percent  
106 BOP (MGI  $\geq 2.0$ , BOP  $\geq 40\%$ ). Subjects could have been diagnosed with stable (treated)  
107 Stage I-IV periodontal disease according to CAL
- 108 6. Had a good general health, as evidenced by medical history
- 109 7. Female subjects of reproductive potential used licensed hormonal contraception or  
110 practiced barrier methods or abstained for at least one month prior to Screening, and  
111 agreed to use such a method during study participation
- 112 8. Male subjects of reproductive potential agreed to use condoms or other methods which  
113 ensured effective contraception with partner.

114  
115  
116  
117  
118  
119  
120  
121  
122  
123  
124  
125  
126  
127  
128  
129  
130  
131  
132  
133  
134  
135  
136  
137  
138  
139  
140  
141

**Exclusion Criteria**

A subject who met any of the following criteria was excluded from the study:

1. Presence of orthodontic appliances (including fixed lingual retainer)
2. Soft or hard tissue tumor of the oral cavity
3. Carious lesions requiring immediate treatment
4. Presence of gross plaque and calculus at the Investigator's discretion
5. Missing natural teeth on one side of the jaw (right or left upper and lower) only
6. Presence of more than six crowns in the mouth
7. Participated in any other clinical study within 30 days of screening or during the study
8. Received any antibiotic therapy within the last 30 days
9. History of chronic use ( $\geq 3$  times/week) of anti-inflammatory medications (e.g., non-steroidal anti-inflammatory drugs [NSAIDs] steroids). Low dose ( $< 325$  mg) aspirin was allowed
10. Was immune compromised (e.g., subjects with Human Immunodeficiency Virus [HIV] infection, neutropenia, complement deficiency, etc.)
11. Medical history or any concomitant medication that could have affected the assessment of the study treatment or periodontal tissues, such as diabetes (irrespective of level of control), rheumatoid arthritis, Crohn's disease, nifedipine, phenytoin (Dilantin), anticoagulant medications (e.g., warfarin [Coumadin] etc.), ongoing cancer treatment either with radiation or chemotherapy
12. Involvement in the planning or conduct of the study
13. History of any clinically significant disease or disorder which, in the opinion of the Investigator, could have either put the subject at risk because of participation in the study, or interfered with interpretation of the subject's study results
14. Was pregnant or lactating
15. Uncontrolled chronic diseases (e.g., kidney disease, chronic obstructive pulmonary disease, pulmonary fibrosis, Hepatitis C)

- 142 16. Autoimmune disorders (Down's Syndrome, Sjogren's Disease, Psoriasis,  
143 Chediak-Higashi Syndrome)
- 144 17. Conditions requiring antibiotic prophylaxis
- 145 18. Underwent periodontal therapy within the past one year
- 146 19. Gross tooth decay, as determined by the Investigator
- 147 20. Periodontal or dental abscesses
- 148 21. Root fragments, pericoronitis, endo-perio lesions
- 149 22. Smoked cigarettes or other tobacco products (including e-cigarette or recreational drug  
150 use) within one year before the screening visit.

151 **Stopping or Suspending the Study**

152 Circumstances that warranted early termination of study included, but were not limited to:

- 153 • Determination of unexpected, significant, or unacceptable risk to subjects
- 154 • Insufficient adherence to protocol requirements
- 155 • Data that were not sufficiently complete and/or evaluable
- 156 • Planned to modify, suspend, or discontinue the development of the IP
- 157 • Determination of futility. No formal futility analysis was planned. However, if serious  
158 safety concerns required the unblinding of all study subjects, a lack of efficacy could  
159 be considered along with the safety concerns as a reason for the premature  
160 termination of the study.

161

162

163

164

165

166

167

168

169

170

171

172 **Results**

173

174 **Supplementary Table 2. Primary Efficacy Analysis—Changes in Mean Modified**  
 175 **Gingival Index at Day 28**

| <b>Statistics</b>          | <b>AMY-101 [0.1 mg]<br/>N=31</b> | <b>Placebo<br/>N=31</b> |
|----------------------------|----------------------------------|-------------------------|
| LSM                        | -0.285                           | -0.104                  |
| SE                         | 0.0259                           | 0.0217                  |
| 95% CI                     | -0.336, -0.234                   | -0.147, -0.062          |
| LSM Difference TRT-Placebo | -0.181                           | -                       |
| SE                         | 0.0340                           | -                       |
| 95% CI                     | -0.248, -0.114                   | -                       |
| p-value                    | <0.001                           | -                       |

176 CI = confidence interval, LSM = least square mean, SE = standard error, TRT = treatment.

177 Least square means (LSM) with 95 % Confidence Interval (CI), standard error (SE), LSM  
 178 difference along with its standard error (SE), 95% CI, and p-value was obtained through a  
 179 Generalized Estimating Equations (GEE) method with normal distribution and Identity link  
 180 including treatment group, study visit (up-to Day 28) and interaction between treatment group and  
 181 study visit (up-to Day 28) as fixed effects with baseline as covariate.

182

183 **Supplementary Table 3. Secondary Efficacy Analysis: Changes in Mean Modified**  
 184 **Gingival Index at Days 21, 60, and 90**

| <b>Visit</b> | <b>Statistics</b>          | <b>AMY-101 [0.1 mg]<br/>(N=31)</b> | <b>Placebo<br/>(N=31)</b> |
|--------------|----------------------------|------------------------------------|---------------------------|
| Day 21       | n                          | 31                                 | 31                        |
|              | LSM                        | -0.238                             | -0.102                    |
|              | SE                         | 0.0163                             | 0.0163                    |
|              | 95% CI                     | -0.270, -0.206                     | -0.134, -0.070            |
|              | LSM Difference TRT-Placebo | -0.136                             |                           |
|              | SE                         | 0.0231                             |                           |

| Visit  | Statistics                 | AMY-101 [0.1 mg]<br>(N=31) | Placebo<br>(N=31) |
|--------|----------------------------|----------------------------|-------------------|
|        | 95% CI                     | -0.182, -0.091             |                   |
|        | p-value                    | <0.001                     |                   |
| Day 60 | n                          | 28                         | 28                |
|        | LSM                        | -0.211                     | -0.062            |
|        | SE                         | 0.0236                     | 0.0147            |
|        | 95% CI                     | -0.257, -0.164             | -0.091, -0.033    |
|        | LSM Difference TRT-Placebo | -0.149                     |                   |
|        | SE                         | 0.0275                     |                   |
|        | 95% CI                     | -0.203, -0.095             |                   |
|        | p-value                    | <0.001                     |                   |
| Day 90 | n                          | 30                         | 30                |
|        | LSM                        | -0.169                     | -0.039            |
|        | SE                         | 0.0227                     | 0.0176            |
|        | 95% CI                     | -0.214, -0.125             | -0.073, -0.004    |
|        | LSM Difference TRT-Placebo | -0.131                     |                   |
|        | SE                         | 0.0192                     |                   |
|        | 95% CI                     | -0.168, -0.093             |                   |
|        | p-value                    | <0.001                     |                   |

185

186

187 **Supplementary Table 4. Secondary Efficacy Analysis: Changes in Mean Bleeding on**  
188 **Probing (BOP)**

| Visit  | Statistics                 | AMY-101 [0.1 mg]<br>(N=31) | Placebo<br>(N=31) |
|--------|----------------------------|----------------------------|-------------------|
| Day 21 | n                          | 31                         | 31                |
|        | LSM                        | -0.190                     | -0.061            |
|        | SE                         | 0.0227                     | 0.0111            |
|        | 95% CI                     | -0.235, -0.146             | -0.083, -0.039    |
|        | LSM Difference TRT-Placebo | -0.129                     |                   |



| Visit  | Statistics                 | AMY-101 [0.1 mg]<br>(N=31) | Placebo<br>(N=31) |
|--------|----------------------------|----------------------------|-------------------|
|        | SE                         | 0.0228                     |                   |
|        | 95% CI                     | -0.174, -0.085             |                   |
|        | p-value                    | <0.001                     |                   |
| Day 28 | n                          | 31                         | 31                |
|        | LSM                        | -0.250                     | -0.074            |
|        | SE                         | 0.0233                     | 0.0150            |
|        | 95% CI                     | -0.296, -0.204             | -0.103, -0.044    |
|        | LSM Difference TRT-Placebo | -0.177                     |                   |
|        | SE                         | 0.0282                     |                   |
|        | 95% CI                     | -0.232, -0.121             |                   |
|        | p-value                    | <0.001                     |                   |
| Day 60 | n                          | 28                         | 28                |
|        | LSM                        | -0.182                     | -0.032            |
|        | SE                         | 0.0329                     | 0.0157            |
|        | 95% CI                     | -0.246, -0.117             | -0.062, -0.001    |
|        | LSM Difference TRT-Placebo | -0.150                     |                   |
|        | SE                         | 0.0309                     |                   |
|        | 95% CI                     | -0.211, -0.090             |                   |
|        | p-value                    | <0.001                     |                   |
| Day 90 | n                          | 30                         | 30                |
|        | LSM                        | -0.187                     | -0.020            |
|        | SE                         | 0.0244                     | 0.0195            |
|        | 95% CI                     | -0.235, -0.139             | -0.058, 0.018     |
|        | LSM Difference TRT-Placebo | -0.168                     |                   |
|        | SE                         | 0.0328                     |                   |
|        | 95% CI                     | -0.232, -0.103             |                   |
|        | p-value                    | <0.001                     |                   |

189

190

191

192

193

194 **Supplementary Table 5: Summary of Treatment Emergent Injection Site Reactions by**  
 195 **System Organ Class and Preferred Term, Safety Population**

| System Organ Class<br>Preferred Term     | AMY-101                    |                           |                           |
|------------------------------------------|----------------------------|---------------------------|---------------------------|
|                                          | 0.025 mg<br>(N=4)<br>n (%) | 0.05 mg<br>(N=4)<br>n (%) | 0.1 mg<br>(N=32)<br>n (%) |
| Total Number of Treatment Emergent ISRs  | 0                          | 0                         | 3                         |
| Number of Subjects with at Least one ISR | 0                          | 0                         | 2 (6.3)                   |
|                                          |                            |                           |                           |
| Gastrointestinal disorders               | 0                          | 0                         | 1 (3.1)                   |
| Gingival erythema                        | 0                          | 0                         | 1 (3.1)                   |
| Gingival swelling                        | 0                          | 0                         | 1 (3.1)                   |
|                                          |                            |                           |                           |
| Nervous system disorders                 | 0                          | 0                         | 1 (3.1)                   |
| Ageusia                                  | 0                          | 0                         | 1 (3.1)                   |

196 AE = adverse event, ISR = injection site reaction, N = number of subjects in safety population in  
 197 each dose group; TEAE = treatment emergent adverse event. Percentages were based on N.

198
