# Supplementary material for: Phase IIa clinical trial of complement C3 inhibitor AMY-101 in adults with periodontal inflammation
Source: JCI journal article supplement (doi:10.1172/jci152973), 2021-10-07
Supplement: sd2 [file 2]

### Checklist for submitting a revised Clinical Medicine manuscript

In addition to addressing the items noted in the decision letter regarding your manuscript, ensure that your revised manuscript adheres to the guidelines below. For full submission details, [visit the JCI website](#).

#### Required files

##### Manuscript

PDF of a clean version of the entire manuscript, including figures, figure legends, and tables

PDF of a marked-up version of the entire manuscript showing revisions and prefaced by a point-by-point response to reviewer comments

Word or RTF file of all text of the submission, including figure legends, tables, table legends, and references (*without* figures, images, or point-by-point responses)

Single PDF file of completed [ICMJE uniform disclosure forms](#) from all authors

For clinical trials, PDF of the appropriate reporting checklist (CONSORT, STROBE, etc.)

##### Figures

Journal staff will contact corresponding authors to request publication-quality figures in TIFF format. See detailed [instructions for figure preparation](#).

Recommended: Graphical abstract ([details available here](#))

##### Supplemental material

Single file containing supplemental material, figures, and modest-sized tables, as:

(a) (if applicable) a PDF highlighting reviewer-requested changes

(b) a clean, publication-quality PDF

Upload any supplemental videos and/or large Excel files separately

##### Gels

APDF, PPT, or PPTX file (distinct from any other supplemental material) that shows the entire unedited gel

Clearly indicate which bands were used for the figures

#### Formatting

Maximum 12,000 words (all text inclusive of title page, full text, references, figure legends, and tables)

Double-spacing throughout, including references and tables; figure legends may be single spaced if necessary to keep a figure and its legend on the same page

All pages numbered

Each section begins on a new page

##### Abbreviations and acronyms

[Standard JCI abbreviations and acronyms](#) used without definition

All other abbreviations and acronyms spelled out at first use in the Abstract and again at first use in the main text (with the abbreviated form appearing in parentheses), and used without definition thereafter

##### Gene and protein names and symbols

Conform to official [NCBI Gene Nomenclature](#)

Presented according to [JCI Gene nomenclature and style](#)

##### Italicization

Generally reserved for gene symbols, genotypes, and species names

Terms such as *in vivo*, *in vitro*, etc., are not italicized

##### Unpublished data, manuscripts in preparation or under review, and personal communications

Cited parenthetically in the text, not as numbered references; e.g., "(Jane L. Doe, UCLA, Los Angeles, California, USA, unpublished observations)"

Written permission to cite unpublished observations of someone outside the author's research team (an email is sufficient) is submitted

##### Reference citations

Appear in parentheses preceded by a space, e.g., "as described previously (1, 2)"; "several research groups (4–10) have found"

No superscript, bold, italics, etc.

##### Figure and table callouts

Figures and tables called out in numerical order

"Figure", "Table", "Supplemental Figure", "Supplemental Table", etc., spelled out

Callouts in parentheses (no boldface or italics) unless grammatically part of the sentence: "the levels increased (Figure 5A)"; "data shown in Table 2"

Parts called out as follows: "Figure 1A", "Figure 2, A and B", "Figure 3, B–D"

#### Manuscript preparation and required reporting

##### Title page

###### Manuscript title

Clear, concise, and limited to 15 words, including conjunctions

Refers to the relevant disease or disease model studied

No subtitles, colons, periods, or nonstandard abbreviations

###### Authors and affiliations

Author names provided in full (for example, "Benita J. Sjögren") and in the appropriate order

No titles, honorifics, degrees, or certifications

Author affiliations correspond to the period when the work was performed

For authors whose affiliation has changed since completion of the work, specify the present affiliation and location below the numbered list

Affiliation footnotes assigned consecutively using superscripted numbers (1, 2, 3, etc.)

Affiliations include departments, institutions, city, state (if applicable), and country (but not mailing addresses or zip/regional codes)

Corresponding author's complete name, address, telephone number (including country code if applicable), and email address

###### Consortium/study groups shown as authors (e.g., CARDIoGRAM Consortium)

Unless the members of the group appear as authors, each individual member and their affiliation are listed in the supplemental material, under the heading Supplemental Acknowledgments

The following sentence appears in Acknowledgments: "See Supplemental Acknowledgments for details on {name of consortium}."

###### Conflict-of-interest statement

A statement consistent with the Journal's [conflict-of-interest policy](#) is included; if no author has a conflict, state the following: "The authors have declared that no conflict of interest exists."

If patents are involved, the patent or patent application number(s) are provided, and the names of the related authors specified

## Abstract

Structured format with the sections Background, Methods, Results, Conclusion, Trial registration, Funding  
Maximum 250 words  
No references  
All nonstandard abbreviations defined at first use

## Main text (presented in the following order)

### Introduction

### Results

### Discussion

### Methods

Demographic reporting  
Reporting on race and ethnicity adheres to [NIH guidelines](#) or other applicable authoritative standards  
Descriptors for any demographic identities are clear, unbiased, and up-to-date  
Data for any demographic variable are inclusive; if any information is unavailable or incomplete, an explanation is provided  
Specify whether the participants or investigators made the classifications; and whether the options were defined by the investigators or participants  
Complete manufacturer name (omit location) provided for each proprietary item used  
For animal models, precise genotype, strain, number of backcrosses, sex, age, and source are specified  
Description of all antibodies used, including the source and catalog/clone number for commercial antibodies or (reference to) a description of the generation of custom antibodies  
Source of all cell lines used is indicated  
Data sets for gene expression microarrays, SNP arrays, and high-throughput sequencing studies are deposited in a public repository, and accession number(s) provided in Methods the main text (for publication, data must be publicly available)

### Statistics

Section appears near the end of Methods (before “Study approval”)  
The *P* value used to determine significance is specified; e.g., “A *P* value less than 0.05 was considered significant.”  
Analysis appropriately corrects for multiple comparisons (more than 2 groups) and for repeated measures (multiple measurements within subjects)  
If samples were excluded, a statement describes inclusion/exclusion criteria

### Study approval

Stand-alone paragraph at the end of Methods  
Declaration of approval of human and/or animal studies, specifying the name and location of the appropriate institutional review board(s)  
For human studies, a statement indicating receipt of written informed consent from participants and/or their parents/guardians  
For use of photographs of patients, a separate statement of written informed consent

### Author contributions

Contribution of each author (identified by initials) is specified  
Grammatically complete sentences  
For manuscripts with 2 or more co-first authors, the method used to assign authorship order among these authors is stated

### Acknowledgments

States sources of support in the form of grants, equipment, or drugs  
Grant numbers provided as applicable  
Other appropriate acknowledgments, such as of colleagues for advice

## References

Styled according to [Journal reference instructions](#)

## Figure legends

Maximum 300 words  
Each begins with stand-alone title, irrespective of the individual parts  
Figure parts called out in boldface: **(A)**, **(B–D)**, **(C and E)**  
Symbols and abbreviations introduced in figures are defined  
In each figure legend where appropriate, the statistical test(s) used is described  
Variance around the mean and statistical analysis not provided for figures representing fewer than 3 independent samples  
For figure panels representing multiple experiments, exact number of samples (*n*) is reported  
For representative experiments, the number of times the experiment was conducted is reported  
For histological panels and insets, scale bars are defined or total original magnification is specified in the figure legends

## Figures

Prepared according to [Journal figure instructions](#)  
For clinical trials, the appropriate flow diagram appears as a figure  
Parts labeled with capital letters: A, B, C, etc., with no designated subparts  
Graphs of quantitative data presented as either dot plots, with average and appropriate error bars indicated; or box-and-whisker plots, with values defined in the legend (bounds of the boxes, lines within the boxes, whiskers, and any outlying values); dynamite plunger plots are not permitted  
If lanes in a gel or blot image are spliced together into a composite image, the lanes are separated with a thin vertical line (black on gray background; white on black background); a note in the legend states that the lanes were run on the same gel but were noncontiguous

## Tables

Prepared in Word table format (not pasted in from another application)  
Self-contained and self-explanatory  
Each table fits on a single page and is presented on its own page  
Preceded by brief titles  
Callouts to footnotes (designated with superscript capital letters) assigned alphabetically row by row  
No subparts or subsections (for example, Table 1A and Table 1B)  
Column headings in tables apply to all values throughout the column; a new row of column headings may not be introduced within a table  
See “Methods” above for demographics reporting

## Supplemental material

A single PDF file includes all supplemental material except videos and spreadsheets. See “Methods” above for large data sets  
Before submission, carefully review all supplemental files; they will not be checked by a copy editor. The Journal is not responsible for any errors contained in supplemental material.
